# Supplementary material
Source: PubMed Central journal article supplement (PMC6487556)
Supplement: BPH-176-1455-s001.pdf [file BPH-176-1455-s001.pdf]

**Supplementary Table 1. Summary of CB1R agonist-bound (5XRA) and antagonist-bound (5TGZ) amino acid residues interacting with cannabinoid ligands in AutoDock.**

| HELIX | CP55,940             |                      | 2-AG                 |                      | THC                  |                      | CBD                  |                      | CBD-DMH              |                      | SR141716A            |                      | Org27569             |                      |
|-------|----------------------|----------------------|----------------------|----------------------|----------------------|----------------------|----------------------|----------------------|----------------------|----------------------|----------------------|----------------------|----------------------|----------------------|
|       | 5XRA                 | 5TGZ                 |
| I     |                      | MM <sup>103</sup>    |                      | MM <sup>103</sup>    |                      | MM <sup>103</sup>    |                      |                      |                      |                      |                      | MM <sup>103</sup>    |                      |                      |
|       |                      |                      |                      |                      |                      |                      |                      |                      |                      |                      | CM <sup>107</sup>    |                      |                      |                      |
|       |                      |                      |                      |                      |                      |                      |                      | MM <sup>109</sup>    |                      |                      |                      |                      |                      |                      |
|       |                      |                      |                      |                      |                      |                      |                      | Q1.31 <sup>115</sup> |                      |                      |                      |                      |                      | Q1.31 <sup>115</sup> |
|       |                      |                      |                      |                      |                      |                      |                      | Q1.32 <sup>116</sup> |                      |                      |                      | Q1.32 <sup>116</sup> |                      | Q1.32 <sup>116</sup> |
|       |                      |                      |                      |                      |                      |                      |                      | I1.35 <sup>119</sup> |                      |                      |                      |                      |                      |                      |
| II    | F2.57 <sup>170</sup> | F2.57 <sup>170</sup> | F2.57 <sup>170</sup> |                      | F2.57 <sup>170</sup> |                      | F2.57 <sup>170</sup> |                      |                      | F2.57 <sup>170</sup> | F2.57 <sup>170</sup> | F2.57 <sup>170</sup> | F2.57 <sup>170</sup> |                      |
|       | S2.60 <sup>173</sup> |                      | S2.60 <sup>173</sup> |                      |                      |                      |                      |                      |                      |                      |                      |                      |                      |                      |
|       |                      |                      |                      |                      | F2.61 <sup>174</sup> |                      |                      |                      |                      |                      | F2.61 <sup>174</sup> | F2.61 <sup>174</sup> | F2.61 <sup>174</sup> | F2.61 <sup>174</sup> |
|       | F2.64 <sup>177</sup> |                      | F2.64 <sup>177</sup> |                      | F2.64 <sup>177</sup> |                      | F2.64 <sup>177</sup> |                      | F2.64 <sup>177</sup> |                      | F2.64 <sup>177</sup> |                      | F2.64 <sup>177</sup> |                      |
|       |                      |                      |                      |                      |                      |                      |                      | H2.65 <sup>178</sup> |                      |                      |                      |                      |                      | H2.65 <sup>178</sup> |
| III   | L3.29 <sup>193</sup> |                      | L3.29 <sup>193</sup> |                      | L3.29 <sup>193</sup> |                      |                      |                      | L3.29 <sup>193</sup> | L3.29 <sup>193</sup> | L3.29 <sup>193</sup> |                      | L3.29 <sup>193</sup> |                      |
|       |                      | T3.33 <sup>197</sup> |                      |                      |                      | T3.33 <sup>197</sup> |                      |                      |                      |                      |
| IV    | F4.77 <sup>268</sup> |                      |                      | F4.77 <sup>268</sup> |                      | F4.77 <sup>268</sup> | F4.77 <sup>268</sup> |                      |                      |                      | F4.77 <sup>268</sup> |                      |                      |                      |
| V     | W5.43 <sup>279</sup> |                      | W5.43 <sup>279</sup> |                      | W5.43 <sup>279</sup> |                      |                      |                      | W5.43 <sup>279</sup> |                      | W5.43 <sup>279</sup> |                      | W5.43 <sup>279</sup> |                      |
| VI    |                      |                      | L6.51 <sup>359</sup> |                      |                      |                      | L6.51 <sup>359</sup> |                      | L6.51 <sup>359</sup> |                      | L6.51 <sup>359</sup> |                      |                      |                      |
|       |                      | M6.55 <sup>363</sup> |                      | M6.55 <sup>363</sup> |                      | M6.55 <sup>363</sup> |                      |                      |                      | M6.55 <sup>363</sup> |                      |                      |                      |                      |
| VII   | F7.34 <sup>379</sup> |                      | F7.34 <sup>379</sup> | A7.36 <sup>380</sup> |                      | A7.36 <sup>380</sup> |
|       | S7.39 <sup>383</sup> |                      |                      |                      | S7.39 <sup>383</sup> | S7.39 <sup>383</sup> |                      |                      |                      |

**Supplementary Table 2. Summary of modeled CB2R agonist-bound (5XRA) and antagonist-bound (5TGZ) amino acid residues interacting with cannabinoid ligands in AutoDock.**

| HELIX | CP55,940             |                      | 2-AG                 |                      | THC                  |                      | CBD                  |                      | CBD-DMH              |                      | SR144528             |                      |
|-------|----------------------|----------------------|----------------------|----------------------|----------------------|----------------------|----------------------|----------------------|----------------------|----------------------|----------------------|----------------------|
|       | 5XRA                 | 5TGZ                 |
| I     |                      | SM <sup>19</sup>     |                      |                      |                      |                      |                      | SM <sup>19</sup>     |                      |                      |                      | SM <sup>19</sup>     |
|       |                      |                      |                      |                      |                      |                      | KM <sup>23</sup>     | KM <sup>23</sup>     |                      |                      |                      |                      |
|       |                      |                      |                      |                      |                      |                      |                      |                      |                      | V1.35 <sup>36</sup>  |                      |                      |
|       |                      |                      |                      |                      |                      |                      |                      |                      |                      | C1.39 <sup>40</sup>  |                      |                      |
| II    | F2.57 <sup>87</sup>  |                      | F2.57 <sup>87</sup>  | F2.57 <sup>87</sup>  | F2.57 <sup>87</sup>  | F2.57 <sup>87</sup>  |                      |                      |                      |                      |                      |                      |
|       | S2.60 <sup>90</sup>  |                      |                      |                      | S2.60 <sup>90</sup>  |                      |                      |                      | S2.60 <sup>90</sup>  |                      | S2.60 <sup>90</sup>  |                      |
|       | F2.61 <sup>91</sup>  |                      |                      |                      |                      |                      | F2.61 <sup>91</sup>  |                      | F2.61 <sup>91</sup>  |                      |                      |                      |
|       |                      |                      |                      |                      |                      |                      | LECL2 <sup>182</sup> | LECL2 <sup>182</sup> |                      |                      |                      |                      |
|       |                      |                      | FECL2 <sup>183</sup> |                      | FECL2 <sup>183</sup> |                      | FECL2 <sup>183</sup> | FECL2 <sup>183</sup> |                      |                      | FECL2 <sup>183</sup> |                      |
| III   | K3.28 <sup>109</sup> |                      |                      |                      |                      |                      |                      |                      |                      |                      |                      |                      |
|       | T3.33 <sup>114</sup> |                      | T3.33 <sup>114</sup> | T3.33 <sup>114</sup> |                      | T3.33 <sup>114</sup> | T3.33 <sup>114</sup> |
| IV    |                      |                      |                      |                      |                      |                      |                      |                      |                      |                      |                      |                      |
| V     |                      | W5.43 <sup>194</sup> |                      | W5.43 <sup>194</sup> |                      | W5.43 <sup>194</sup> |                      |                      |                      |                      |                      | W5.43 <sup>194</sup> |
| VI    |                      | W6.48 <sup>258</sup> |                      | W6.48 <sup>258</sup> |                      | W6.48 <sup>258</sup> |                      |                      |                      |                      |                      | W6.48 <sup>258</sup> |
| VII   |                      |                      | K7.31 <sup>278</sup> |                      |                      |                      |                      |                      | K7.31 <sup>278</sup> |                      | K7.31 <sup>278</sup> |                      |
|       |                      |                      | A7.36 <sup>282</sup> |                      | A7.36 <sup>282</sup> |                      | A7.36 <sup>282</sup> |                      | A7.36 <sup>282</sup> | A7.36 <sup>282</sup> | A7.36 <sup>282</sup> |                      |
|       |                      |                      |                      |                      |                      |                      |                      |                      |                      | A7.39 <sup>285</sup> |                      |                      |
|       |                      |                      |                      |                      |                      |                      |                      |                      |                      | M7.39 <sup>286</sup> |                      |                      |
|       |                      | L7.43 <sup>289</sup> |                      | L7.43 <sup>289</sup> |                      | L7.43 <sup>289</sup> |                      |                      |                      |                      |                      | L7.43 <sup>289</sup> |
